# Supplementary material for: Increased expression of matrix metalloproteinase 3 can be attenuated by inhibition of microRNA-155 in cultured human astrocytes
Source: PubMed Central journal article supplement (PMC6054845; doi:10.1186/s12974-018-1245-y), 2018-07-21
Supplement: 12974_2018_1245_MOESM4_ESM.pdf [file 12974_2018_1245_MOESM4_ESM.pdf]

## Supplementary Figure 3

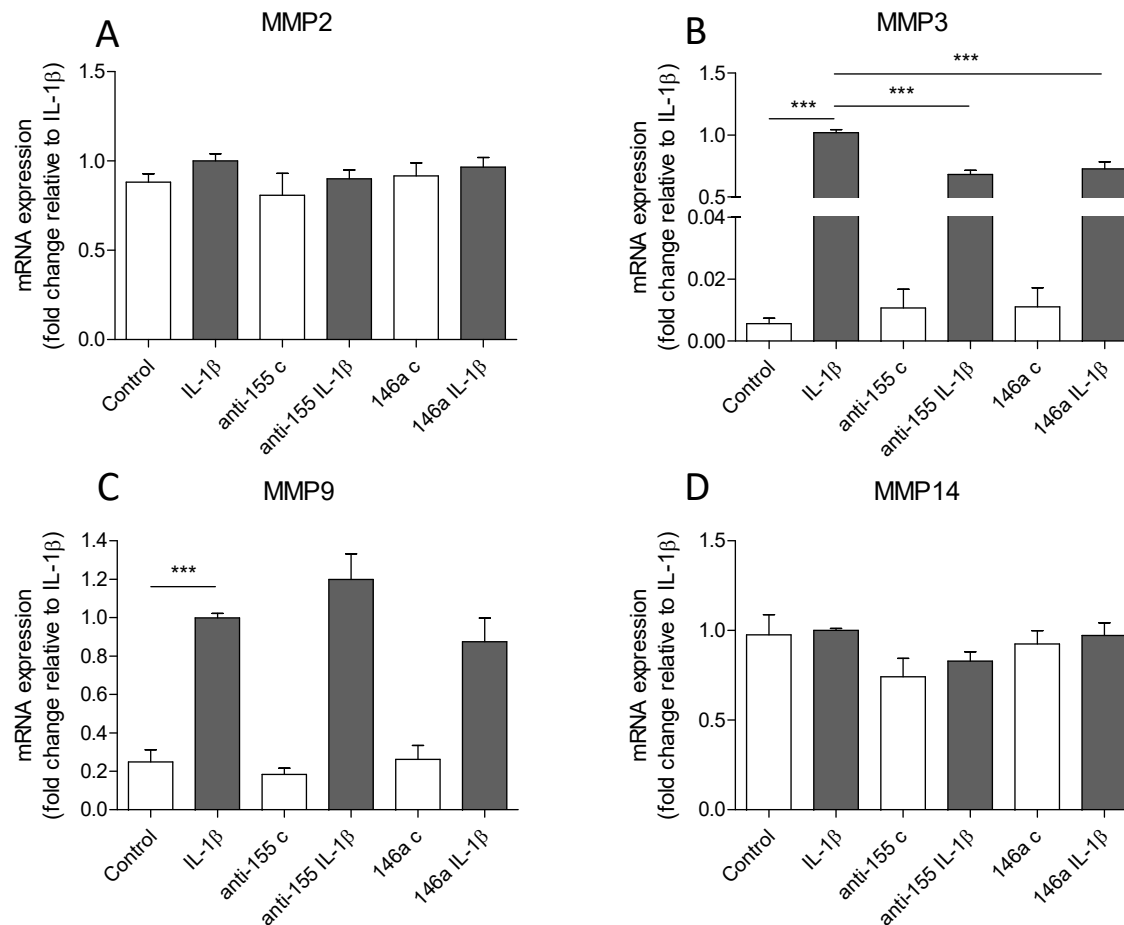

**Supplementary Fig. 3.** RT-qPCR analysis demonstrated an increased expression of MMP3 (**B**,  $p < 0.001$ ) and MMP9 (**C**,  $p < 0.001$ ), but not MMP2 (**A**) and MMP14 (**D**) mRNA following IL-1 $\beta$  stimulation in human fetal astrocytes; (**B**) MMP3 expression was decreased in cells transfected with the antagomiR of miR-155 ( $p < 0.001$ ) or mimic of miR-146a ( $p < 0.001$ ) after IL-1 $\beta$  stimulation; (**A-D**) The expression of MMPs did not change in transfected cells compared to control (lipofectamine vehicle) when IL-1 $\beta$  was not applied; \*\*\*  $p < 0.01$ , Mann-Whitney U test, error bars depict the standard error of the mean; c – control, anti-155 - antagomiR of miR-155.
