# Supplementary material for: Increased expression of matrix metalloproteinase 3 can be attenuated by inhibition of microRNA-155 in cultured human astrocytes
Source: PubMed Central journal article supplement (PMC6054845; doi:10.1186/s12974-018-1245-y), 2018-07-21
Supplement: 12974_2018_1245_MOESM5_ESM.pdf [file 12974_2018_1245_MOESM5_ESM.pdf]

## Supplementary Figure 4

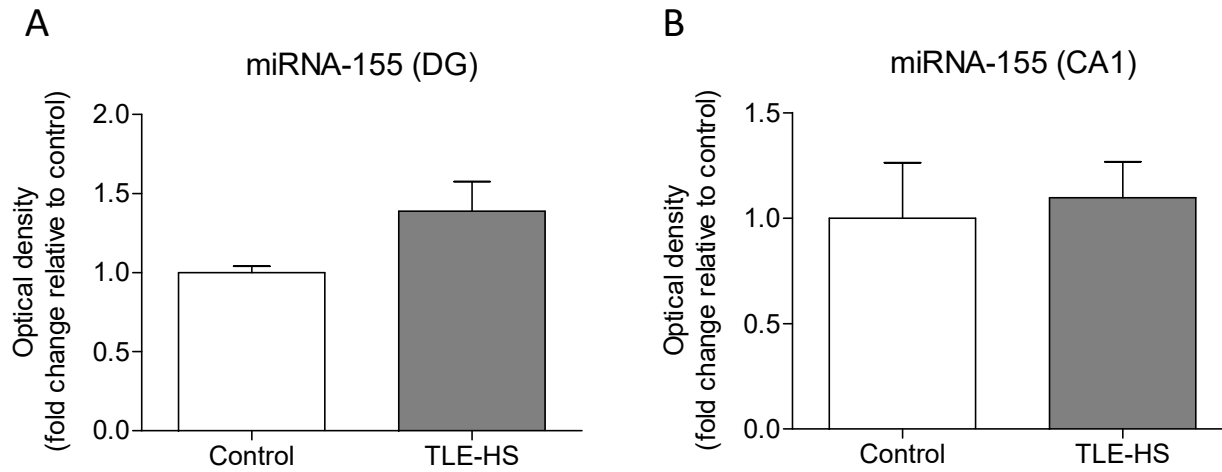

**Supplementary Fig. 4.** Quantitative analysis of miR-155 in situ hybridization in the dentate gyrus (DG, **A**) or CA1 area (**B**) of resected brain tissue of patients with TLE-HS showed a trend towards upregulation in the DG. Mann-Whitney U test, error bars depict the standard error of the mean.
