# Supplementary material for: Increased expression of matrix metalloproteinase 3 can be attenuated by inhibition of microRNA-155 in cultured human astrocytes
Source: PubMed Central journal article supplement (PMC6054845; doi:10.1186/s12974-018-1245-y), 2018-07-21
Supplement: 12974_2018_1245_MOESM6_ESM.pdf [file 12974_2018_1245_MOESM6_ESM.pdf]

## Supplementary Figure 5

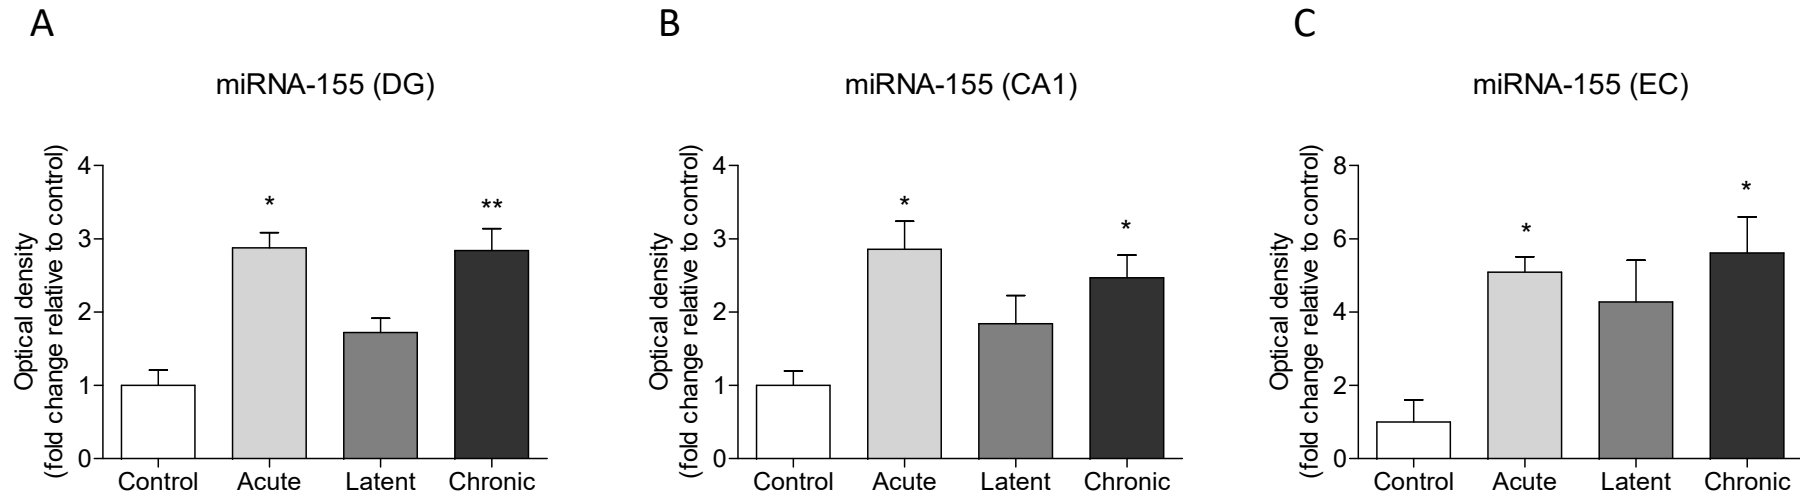

**Supplementary Fig. 5.** Quantitative analysis of miR-155 in situ hybridization in the rat TLE model showed increased miR-155 expression in the dentate gyrus (DG; **A**, acute stage  $p < 0.05$ , chronic stage  $p < 0.01$ ), CA1 area (**B**, acute stage  $p < 0.05$ , chronic stage  $p < 0.05$ ), and entorhinal cortex (EC) (**C**, acute stage  $p < 0.05$ , chronic stage  $p < 0.01$ ); Mann-Whitney U test, error bars depict the standard error of the mean.
